# Supplementary material for: Mercury isotopes identify near-surface marine mercury in deep-sea trench biota
Source: PubMed Central journal article supplement — Proc Natl Acad Sci U S A. 2020 Nov 16;117(47):29292–8. doi: 10.1073/pnas.2012773117 (PMC7703561; doi:10.1073/pnas.2012773117), 2020-11-16
Supplement: pnas.2012773117.sapp.pdf [file pnas.2012773117.sapp.pdf]

Figure SI-1  $\Delta^{199}\text{Hg}$  versus  $\Delta^{201}\text{Hg}$  of all samples. Symbols are the same as in Figure 1. Line is a best fit (42) regression with slope of  $1.24 \pm 0.02$ . See Table SI-2 for analytical uncertainty of isotope values.

Figure SI-2  $\Delta^{200}\text{Hg}$  versus  $\Delta^{204}\text{Hg}$  of all samples. Symbols are the same as in Figure 1. Line is a best fit (42) regression with slope of  $-0.48 \pm 0.08$ . See Table SI-2 for analytical uncertainty of isotope values.

Blum Fig. SI-1

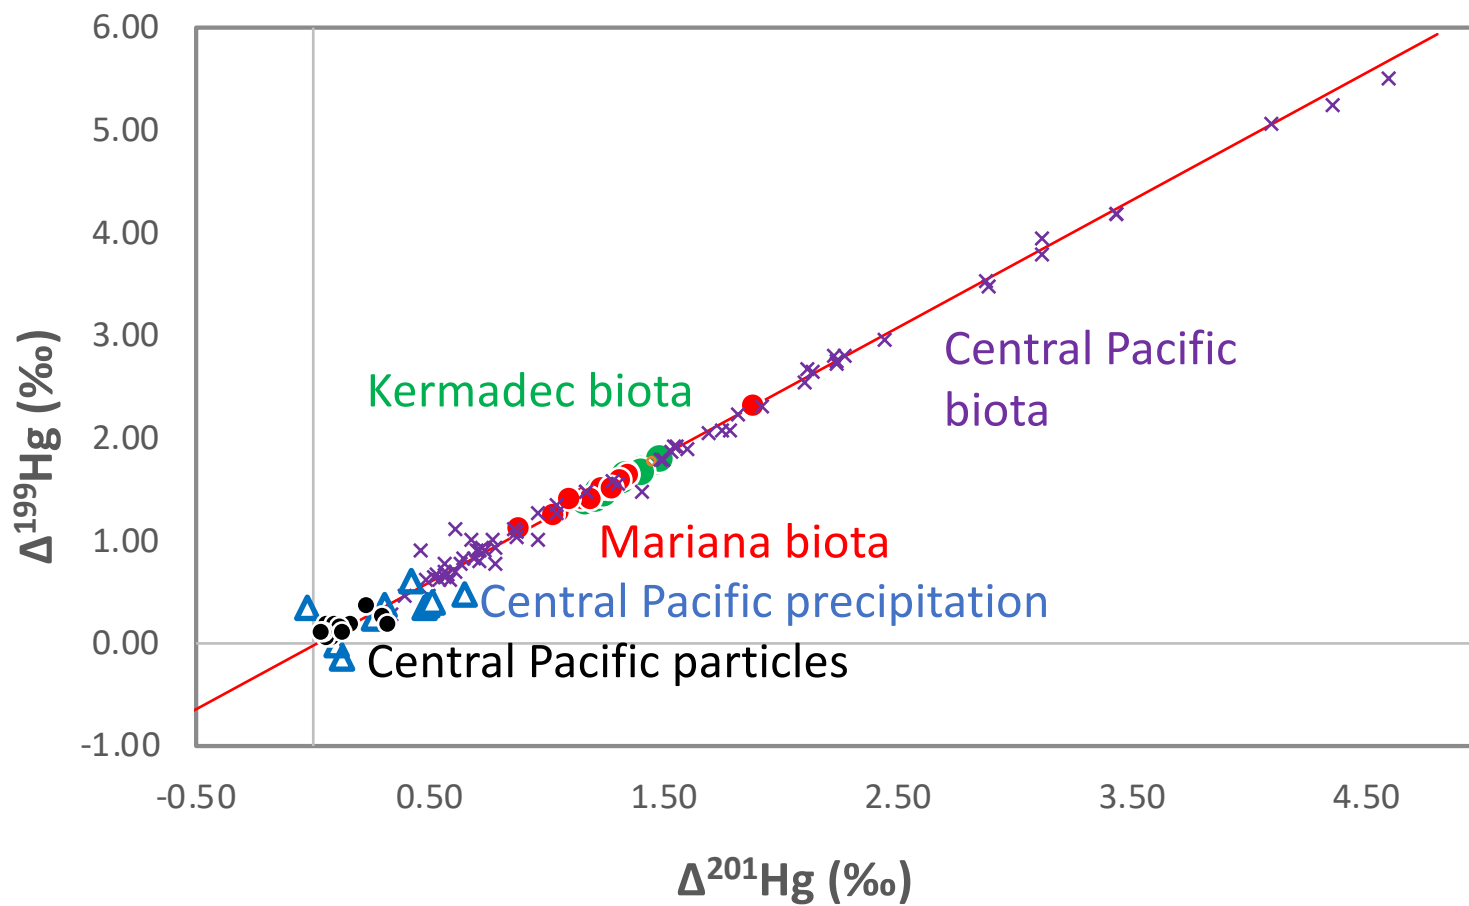

Blum Fig. SI-2

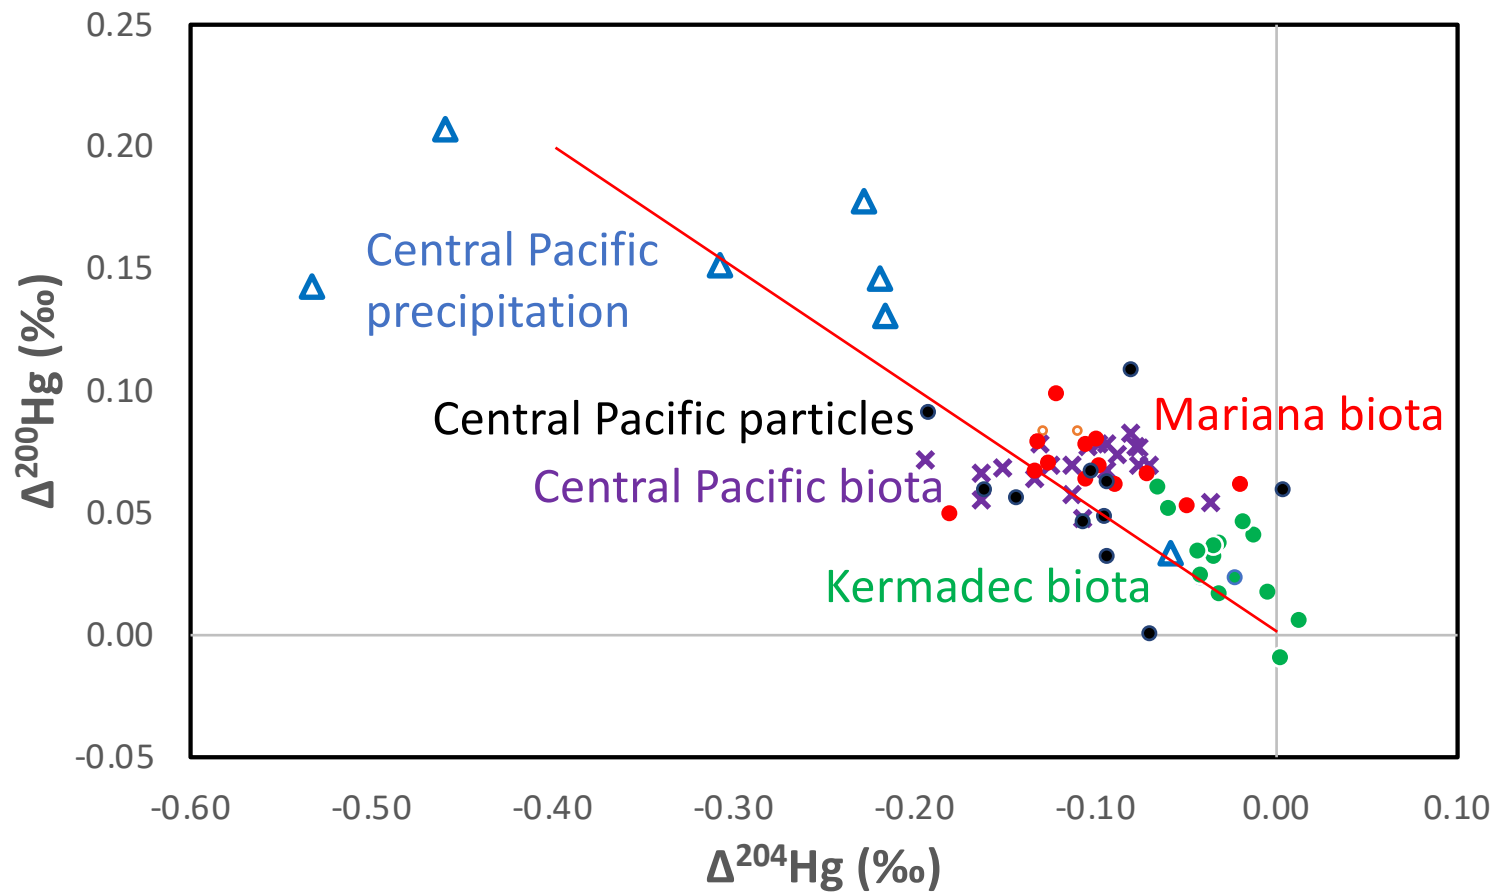

Table SI-1. Sample data and Hg isotope results (%) for hadal fauna from the Kermadec and Mariana deep-sea trenches.

| Sample Type   | Sample #      | Trench   | Deployment # | Latitude | Longitude                | Species                             | Depth (m) | Length (cm) | Wet Weight (g) | Dry Weight (g) | Dry Mass Hg (ng/g) | Analysis Solution Hg (ng/g) | $\delta^{202}\text{Hg}$ | $\Delta^{199}\text{Hg}$ | $\Delta^{200}\text{Hg}$ | $\Delta^{201}\text{Hg}$ | $\Delta^{204}\text{Hg}$ |
|---------------|---------------|----------|--------------|----------|--------------------------|-------------------------------------|-----------|-------------|----------------|----------------|--------------------|-----------------------------|-------------------------|-------------------------|-------------------------|-------------------------|-------------------------|
| Fish          | 100171        | Kermadec | TR11         | -35.6718 | -178.8833                | <i>Notoliparis kermadecensis</i>    | 7515      | 18.3        | 80             |                | 3708               | 5.0                         | 1.05                    | 1.56                    | 0.02                    | 1.33                    | -0.04                   |
|               | 100175        | Kermadec | TR11         | -35.6718 | -178.8833                | <i>Notoliparis kermadecensis</i>    | 7515      | 18.3        | 46             |                | 3089               | 5.0                         | 1.04                    | 1.56                    | 0.02                    | 1.33                    | 0.00                    |
|               | 100310        | Kermadec | TR16         | -31.9135 | -177.4822                | <i>Notoliparis kermadecensis</i>    | 7251      | 21          | 94             |                | 3123               | 5.0                         | 1.02                    | 1.56                    | 0.02                    | 1.32                    | -0.02                   |
|               | 200033        | Mariana  | WT04         | 12.4151  | 144.9119                 | <i>Pseudoliparis swirei</i>         | 7495      | 12.6        | 45             |                | 1527               |                             |                         |                         |                         |                         |                         |
|               | 200039        | Mariana  | TR07         | 12.4235  | 144.8706                 | <i>Pseudoliparis swirei</i>         | 7497      | 21          | 150            |                | 3342               | 5.0                         | 0.65                    | 1.78                    | 0.08                    | 1.45                    | -0.13                   |
|               | 200070        | Mariana  | TR10         | 11.9128  | 144.9514                 | <i>Pseudoliparis swirei</i>         | 7841      | 17.2        | 65             |                | 2283               | 5.0                         | 0.43                    | 1.55                    | 0.08                    | 1.24                    | -0.11                   |
| Amphipod      | 100355 (I)    | Kermadec | TR18         | -31.9145 | -176.9187                | <i>Scopelocheirus schellenbergi</i> | 5958      | 3.2         | 0.724          | 0.0666         | 5722               | 5.0                         | 1.11                    | 1.77                    | 0.02                    | 1.47                    | -0.04                   |
|               | 100355 (II)   | Kermadec | TR18         | -31.9145 | -176.9187                | <i>Scopelocheirus schellenbergi</i> | 5958      | 2.5         | 0.235          | 0.0361         | 1500               | 5.0                         | 0.85                    | 1.45                    | 0.03                    | 1.20                    | -0.03                   |
|               | 100355 (III)  | Kermadec | TR18         | -31.9145 | -176.9187                | <i>Scopelocheirus schellenbergi</i> | 5958      | 2           | 0.121          | 0.0208         | 2415               | 5.0                         | 0.76                    | 1.57                    | 0.04                    | 1.31                    | -0.03                   |
|               | 100355 (IV)   | Kermadec | TR18         | -31.9145 | -176.9187                | <i>Scopelocheirus schellenbergi</i> | 5958      | 2.3         | 0.201          | 0.0254         | 13579              | 5.0                         | 1.39                    | 1.38                    | 0.01                    | 1.16                    | 0.01                    |
|               | 100331 (I)    | Kermadec | TR17         | -31.8896 | -177.5333                | <i>Scopelocheirus schellenbergi</i> | 6456      | 2.2         | 0.1701         | 0.0220         | 2365               | 5.0                         | 0.56                    | 1.48                    | 0.02                    | 1.23                    | -0.03                   |
|               | 100331 (II)   | Kermadec | TR17         | -31.8896 | -177.5333                | <i>Scopelocheirus schellenbergi</i> | 6456      | 2.6         | 0.4176         | 0.1113         | 461                | 5.0                         | 0.96                    | 1.58                    | 0.04                    | 1.33                    | -0.01                   |
|               | 100331 (III)  | Kermadec | TR17         | -31.8896 | -177.5333                | <i>Scopelocheirus schellenbergi</i> | 6456      | 3.5         | 1.0228         | 0.0887         | 12353              | 5.0                         | 0.94                    | 1.69                    | 0.04                    | 1.41                    | -0.03                   |
|               | 100331 (IV)   | Kermadec | TR17         | -31.8896 | -177.5333                | <i>Scopelocheirus schellenbergi</i> | 6456      | 2.8         | 0.2651         | 0.0375         | 1924               | 5.0                         | 1.07                    | 1.79                    | 0.05                    | 1.48                    | -0.02                   |
|               | 100203A (I)   | Kermadec | TR15         | -31.9310 | -177.3008                | <i>Hirondellea dubia</i>            | 10005     | 1.1         | 0.0466         | 0.0094         |                    |                             |                         |                         |                         |                         |                         |
|               | 100203A (II)  | Kermadec | TR15         | -31.9310 | -177.3008                | <i>Hirondellea dubia</i>            | 10005     | 1.4         | 0.0619         | 0.0129         | 505                | 3.0                         | 0.82                    | 1.40                    | -0.01                   | 1.21                    | 0.00                    |
|               | 100203A (III) | Kermadec | TR15         | -31.9310 | -177.3008                | <i>Hirondellea dubia</i>            | 10005     | 1.5         | 0.0641         | 0.0154         |                    |                             |                         |                         |                         |                         |                         |
|               | 100203B (I)   | Kermadec | TR15         | -31.9310 | -177.3008                | <i>Hirondellea dubia</i>            | 10005     | 1.6         | 0.0845         | 0.0175         |                    |                             |                         |                         |                         |                         |                         |
|               | 100203B (II)  | Kermadec | TR15         | -31.9310 | -177.3008                | <i>Hirondellea dubia</i>            | 10005     | 1.4         | 0.0635         | 0.0156         | 615                | 3.0                         | 0.94                    | 1.67                    | 0.05                    | 1.40                    | -0.06                   |
|               | 100203B (III) | Kermadec | TR15         | -31.9310 | -177.3008                | <i>Hirondellea dubia</i>            | 10005     | 0.8         | 0.0182         | 0.0041         |                    |                             |                         |                         |                         |                         |                         |
|               | 100203C (I)   | Kermadec | TR15         | -31.9310 | -177.3008                | <i>Hirondellea dubia</i>            | 10005     | 1.6         | 0.0827         | 0.0168         |                    |                             |                         |                         |                         |                         |                         |
|               | 100203C (II)  | Kermadec | TR15         | -31.9310 | -177.3008                | <i>Hirondellea dubia</i>            | 10005     | 1.2         | 0.0392         | 0.0104         | 664                | 3.0                         | 0.73                    | 1.63                    | 0.03                    | 1.34                    | -0.04                   |
|               | 100203C (III) | Kermadec | TR15         | -31.9310 | -177.3008                | <i>Hirondellea dubia</i>            | 10005     | 1           | 0.0340         | 0.0084         |                    |                             |                         |                         |                         |                         |                         |
|               | 100203D (I)   | Kermadec | TR15         | -31.9310 | -177.3008                | <i>Hirondellea dubia</i>            | 10005     | 1.5         | 0.0769         | 0.0199         |                    |                             |                         |                         |                         |                         |                         |
|               | 100203D (II)  | Kermadec | TR15         | -31.9310 | -177.3008                | <i>Hirondellea dubia</i>            | 10005     | 1.1         | 0.0297         | 0.0078         | 408                | 2.3                         | 0.74                    | 1.46                    | 0.06                    | 1.24                    | -0.06                   |
|               | 100203D (III) | Kermadec | TR15         | -31.9310 | -177.3008                | <i>Hirondellea dubia</i>            | 10005     | 1.3         | 0.0607         | 0.0158         |                    |                             |                         |                         |                         |                         |                         |
|               | 200086A (I)   | Mariana  | TR12         | 11.8107  | 144.9945                 | <i>Hirondellea gigas?</i>           | 6898      | 1.8         | 0.1245         | 0.0214         |                    |                             |                         |                         |                         |                         |                         |
|               | 200086A (II)  | Mariana  | TR12         | 11.8107  | 144.9945                 | <i>Hirondellea gigas?</i>           | 6898      | 1.5         | 0.1242         | 0.0185         | 430                | 2.3                         | 0.02                    | 1.13                    | 0.08                    | 0.88                    | -0.10                   |
|               | 200086B (I)   | Mariana  | TR12         | 11.8107  | 144.9945                 | <i>Hirondellea gigas?</i>           | 6898      | 2.1         | 0.2120         | 0.0278         |                    |                             |                         |                         |                         |                         |                         |
|               | 200086B (II)  | Mariana  | TR12         | 11.8107  | 144.9945                 | <i>Hirondellea gigas?</i>           | 6898      | 1.2         | 0.0938         | 0.0165         | 326                | 2.3                         | 0.19                    | 1.41                    | 0.10                    | 1.18                    | -0.12                   |
|               | 200132A (I)   | Mariana  | TR19         | 12.2766  | 144.6202                 | <i>Hirondellea gigas?</i>           | 7626      | 1.1         | 0.0967         |                |                    |                             |                         |                         |                         |                         |                         |
|               | 200132A (II)  | Mariana  | TR19         | 12.2766  | 144.6202                 | <i>Hirondellea gigas?</i>           | 7626      | 1.9         | 0.1269         | 0.0252         | 227                | 1.4                         | 0.52                    | 1.52                    | 0.06                    | 1.28                    | -0.09                   |
|               | 200132A (III) | Mariana  | TR19         | 12.2766  | 144.6202                 | <i>Hirondellea gigas?</i>           | 7626      | 1.5         | 0.0888         | 0.0125         |                    |                             |                         |                         |                         |                         |                         |
|               | 200132B (I)   | Mariana  | TR19         | 12.2766  | 144.6202                 | <i>Hirondellea gigas?</i>           | 7626      | 1.8         | 0.1478         | 0.0342         |                    |                             |                         |                         |                         |                         |                         |
|               | 200132B (II)  | Mariana  | TR19         | 12.2766  | 144.6202                 | <i>Hirondellea gigas?</i>           | 7626      | 1.3         | 0.0700         | 0.0164         | 389                | 4.3                         | 0.22                    | 1.25                    | 0.08                    | 1.03                    | -0.11                   |
|               | 200132B (III) | Mariana  | TR19         | 12.2766  | 144.6202                 | <i>Hirondellea gigas?</i>           | 7626      | 1.6         | 0.1155         | 0.0185         |                    |                             |                         |                         |                         |                         |                         |
|               | 200132C (I)   | Mariana  | TR19         | 12.2766  | 144.6202                 | <i>Hirondellea gigas?</i>           | 7626      | 1.2         | 0.1090         | 0.0276         |                    |                             |                         |                         |                         |                         |                         |
|               | 200132C (II)  | Mariana  | TR19         | 12.2766  | 144.6202                 | <i>Hirondellea gigas?</i>           | 7626      | 1.9         | 0.1723         | 0.0294         | 166                | 1.4                         | 0.16                    | 1.39                    | 0.05                    | 1.10                    | -0.18                   |
|               | 200132C (III) | Mariana  | TR19         | 12.2766  | 144.6202                 | <i>Hirondellea gigas?</i>           | 7626      | 1           | 0.0726         | 0.0064         |                    |                             |                         |                         |                         |                         |                         |
| 200129 (I)    | Mariana       | WT14     | 12.0724      | 144.5930 | <i>Hirondellea gigas</i> | 10250                               | 4.5       | 2.4971      | 0.6607         | 255            | 5.0                | 0.02                        | 1.52                    | 0.07                    | 1.28                    | -0.10                   |                         |
| 200129 (II)   | Mariana       | WT14     | 12.0724      | 144.5930 | <i>Hirondellea gigas</i> | 10250                               | 4         | 1.5983      | 0.5066         | 162            | 5.0                | 0.23                        | 1.50                    | 0.05                    | 1.26                    | -0.05                   |                         |
| 200129 (III)  | Mariana       | WT14     | 12.0724      | 144.5930 | <i>Hirondellea gigas</i> | 10250                               | 4.5       | 1.8601      | 0.5817         | 286            | 5.0                | 0.14                        | 1.63                    | 0.06                    | 1.34                    | -0.10                   |                         |
| 200129 (IV)   | Mariana       | WT14     | 12.0724      | 144.5930 | <i>Hirondellea gigas</i> | 10250                               | 3         | 0.6138      | 0.2366         | 711            | 5.0                | 0.70                        | 1.60                    | 0.07                    | 1.31                    | -0.07                   |                         |
| 200129 (V)    | Mariana       | WT14     | 12.0724      | 144.5930 | <i>Hirondellea gigas</i> | 10250                               | 2.6       | 0.3602      | 0.1267         | 170            | 3.0                | 0.06                        | 1.40                    | 0.06                    | 1.16                    | -0.02                   |                         |
| 200129 (VI)   | Mariana       | WT14     | 12.0724      | 144.5930 | <i>Hirondellea gigas</i> | 10250                               | 3.2       | 0.6674      | 0.2404         | 483            | 5.0                | 0.51                        | 1.50                    | 0.07                    | 1.23                    | -0.13                   |                         |
| 200129 (VII)  | Mariana       | WT14     | 12.0724      | 144.5930 | <i>Hirondellea gigas</i> | 10250                               | 3         | 0.9945      | 0.3291         | 431            | 5.0                | 0.10                        | 1.27                    | 0.07                    | 1.05                    | -0.13                   |                         |
| 200129 (VIII) | Mariana       | WT14     | 12.0724      | 144.5930 | <i>Hirondellea gigas</i> | 10250                               | 4.1       | 1.3642      | 0.4853         | 355            | 5.0                | 0.53                        | 2.31                    | 0.08                    | 1.88                    | -0.13                   |                         |

Table SI-2 Hg isotope values and 2SD uncertainties (%) for multiple preparations of standard reference materials. 2SD values in bold are used as estimates of the analytical uncertainty associated with corresponding sample isotope values in Table SI-2.

| Reference Material | n Preparations | $\delta^{202}$ | 2SD         | $\Delta^{199}$ | 2SD         | $\Delta^{200}$ | 2SD         | $\Delta^{201}$ | 2SD         | $\Delta^{204}$ | 2SD         |
|--------------------|----------------|----------------|-------------|----------------|-------------|----------------|-------------|----------------|-------------|----------------|-------------|
| UM-Almaden         | 5              | -0.55          | <b>0.06</b> | -0.02          | <b>0.02</b> | 0.00           | 0.01        | -0.04          | 0.03        | -0.01          | 0.02        |
| NIST SRM3133       | 4              | -0.02          | 0.03        | 0.00           | 0.02        | -0.01          | 0.02        | -0.01          | 0.02        | -0.02          | 0.04        |
| NRC TORT-3         | 4              | 0.06           | 0.04        | 0.69           | 0.02        | 0.06           | <b>0.02</b> | 0.56           | <b>0.03</b> | -0.08          | <b>0.06</b> |
| NRC DORM-4         | 1              | 0.49           |             | 1.80           |             | 0.06           |             | 1.46           |             | -0.13          |             |
